# Supplementary material for: CO2-selective free-standing membrane by self-assembly of a UV-crosslinkable diblock copolymer
Source: Royal Society of Chemistry journal article supplement (doi:10.1039/c2jm31037f), 2012-01-01
Supplement: c2jm31037f.pdf [file c2jm31037f.pdf]

## Supplementary Information

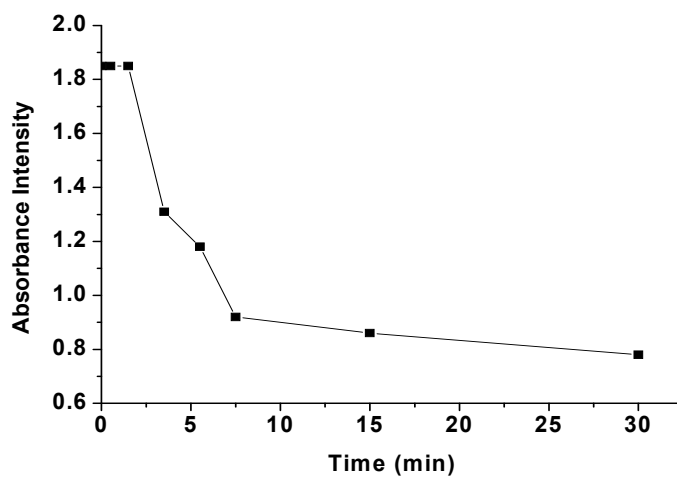

Figure S1. The absorption intensity at peak of 325 nm versus time

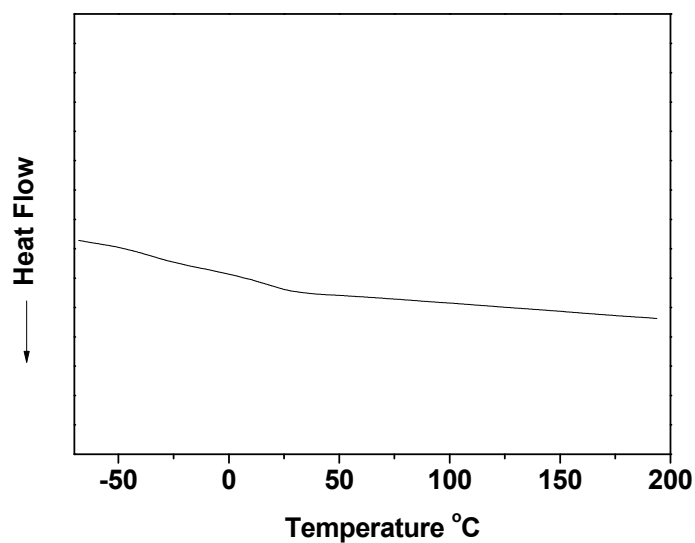

Figure S2. DSC curve of block copolymer during the second heating at a rate of 10 °C/min. The second heating was after the samples were heated to 200 °C and then cooled to -80 °C at the rate of 20 °C/min.

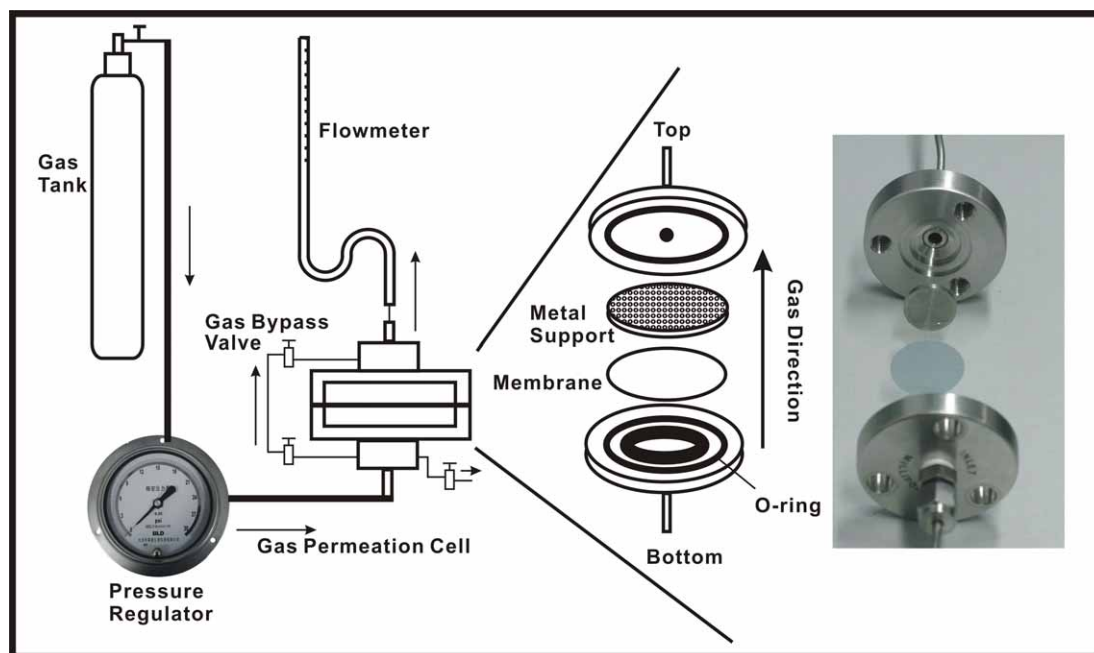

Figure S3. Schematic representation of the home-built permeation apparatus (not drawn to scale).
